# Supplementary material
Source: Springer Nature journal article supplement (https://www.springermedizin.de/resource/supplementary/12963_2012_219_MOESM6_ESM.pdf/9572372)

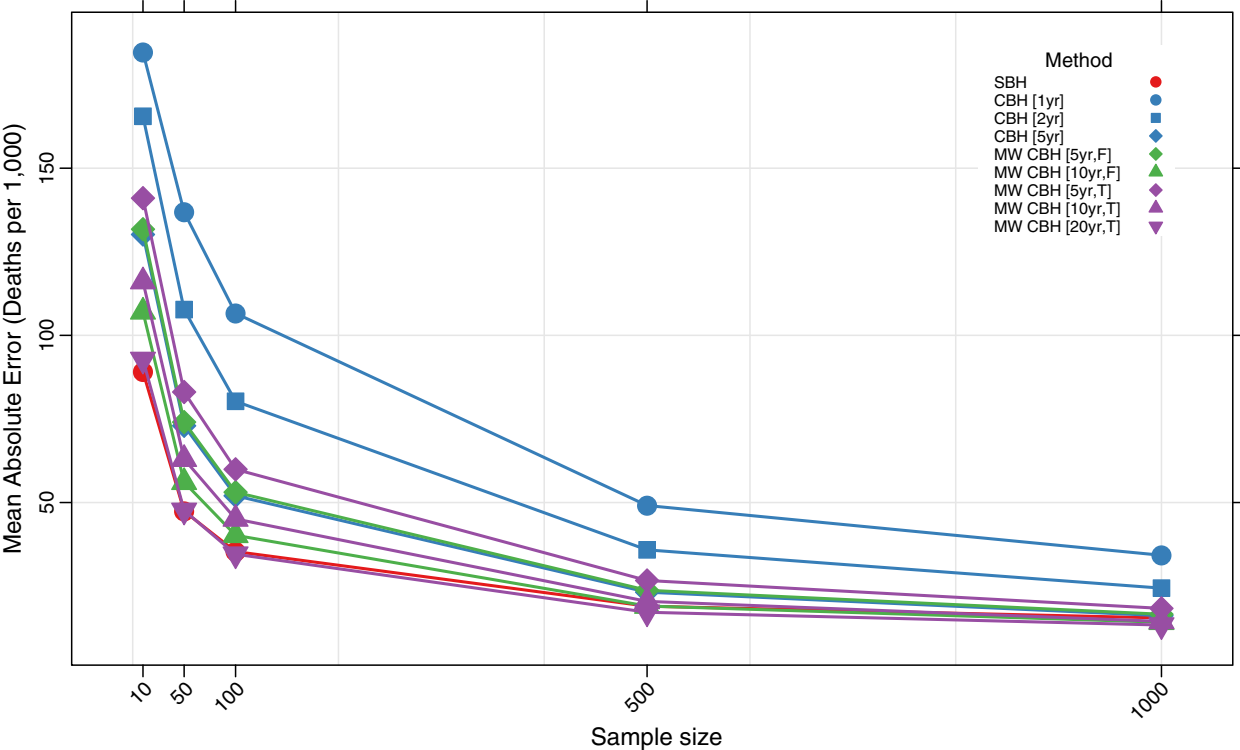

Supplement: MOESM6 [file 9572372]
